# Supplementary material for: A Parameter Estimation of Photovoltaic Models Using a Boosting Flower Pollination Algorithm
Source: MDPI journal article supplement (doi:10.3390/s23198324), 2023-10-08
Supplement: s1 [file s1]

**Table S1.** The ranges of dentification parameters on different models.

| Parameter                             | SDM/DDM     |             | PMM         |             |
|---------------------------------------|-------------|-------------|-------------|-------------|
|                                       | Lower bound | Upper bound | Lower bound | Upper bound |
| $I_{ph}$ (A)                          | 0           | 1           | 0           | 2           |
| $R_s$ ( $\Omega$ )                    | 0           | 0.5         | 0           | 2           |
| $R_{sh}$ ( $\Omega$ )                 | 0           | 100         | 0           | 2000        |
| $I_{sd}, I_{sd1}, I_{sd2}$ ( $\mu$ A) | 0           | 1           | 0           | 50          |
| $n, n_1, n_2$                         | 1           | 2           | 1           | 50          |

**Table S2.** Parameters settings of the selected methods.

| Methods | Parameters                                         |
|---------|----------------------------------------------------|
| BSA     | $N = 30$ , mix-rate=1.0                            |
| CSA     | $N = 30$ , $\alpha = 0.1$ , $\beta = 0.15$ , $M=3$ |
| GOTLBO  | $N = 30$ , $Jr=0.8$                                |
| JADE    | $N = 30$ , $P_{best}$ rate =0.05, $c = 0.1$        |
| MPA     | $N = 30$ , $FADs = 0.2$ , $P = 0.5$                |
| PGJAYA  | $N = 30$                                           |
| RIME    | $N = 30$ , $w = 5.0$                               |
| FPA     | $N = 30$ , $p = 0.8$                               |
| BFPA    | $N = 30$ , $p = 0.95$ , $\alpha = 0.3$             |

**Table S3.** The statistical results of different methods.

| Item | Methods | Best                                           | Median                                         | Mean                                           | Worst                                          | STD                                      |
|------|---------|------------------------------------------------|------------------------------------------------|------------------------------------------------|------------------------------------------------|------------------------------------------|
| SDM  | BSA     | $9.98587889 \times 10^{-04}$                   | $1.26484874 \times 10^{-03}$                   | $1.28652241 \times 10^{-03}$                   | $1.73105320 \times 10^{-03}$                   | $1.72 \times 10^{-04}$                   |
|      | CSA     | $1.57400251 \times 10^{-03}$                   | $1.88482156 \times 10^{-03}$                   | $1.91181192 \times 10^{-03}$                   | $2.34754518 \times 10^{-03}$                   | $2.28 \times 10^{-04}$                   |
|      | GOTLBO  | $9.86489640 \times 10^{-04}$                   | $1.21098764 \times 10^{-03}$                   | $1.22494085 \times 10^{-03}$                   | $1.68253427 \times 10^{-03}$                   | $1.92 \times 10^{-04}$                   |
|      | JADE    | $9.86022997 \times 10^{-04}$                   | $9.95295220 \times 10^{-04}$                   | $1.04988222 \times 10^{-03}$                   | $1.36489253 \times 10^{-03}$                   | $1.06 \times 10^{-04}$                   |
|      | MPA     | $1.04794349 \times 10^{-03}$                   | $2.30772086 \times 10^{-03}$                   | $2.38247234 \times 10^{-03}$                   | $6.27473533 \times 10^{-03}$                   | $1.05 \times 10^{-03}$                   |
|      | PGJAYA  | $9.86022139 \times 10^{-04}$                   | $9.90708089 \times 10^{-04}$                   | $9.97068538 \times 10^{-04}$                   | $1.04874839 \times 10^{-03}$                   | $1.78 \times 10^{-05}$                   |
|      | RIME    | $1.00066761 \times 10^{-03}$                   | $1.58314674 \times 10^{-03}$                   | $1.87409575 \times 10^{-03}$                   | $3.80335507 \times 10^{-03}$                   | $8.20 \times 10^{-04}$                   |
|      | FPA     | $1.14571574 \times 10^{-03}$                   | $1.75858880 \times 10^{-03}$                   | $1.79679861 \times 10^{-03}$                   | $2.39674103 \times 10^{-03}$                   | $3.74 \times 10^{-04}$                   |
|      | BFPA    | <b><math>9.86021878 \times 10^{-04}</math></b> | <b><math>9.86021878 \times 10^{-04}</math></b> | <b><math>9.86021878 \times 10^{-04}</math></b> | <b><math>9.86021878 \times 10^{-04}</math></b> | <b><math>2.85 \times 10^{-17}</math></b> |
| DDM  | BSA     | $1.04455879 \times 10^{-03}$                   | $1.40474248 \times 10^{-03}$                   | $1.41689648 \times 10^{-03}$                   | $2.10207873 \times 10^{-03}$                   | $2.68 \times 10^{-04}$                   |
|      | CSA     | $1.10028472 \times 10^{-03}$                   | $1.26900715 \times 10^{-03}$                   | $1.53876290 \times 10^{-03}$                   | $2.38026591 \times 10^{-03}$                   | $4.93 \times 10^{-04}$                   |
|      | GOTLBO  | $1.06633593 \times 10^{-03}$                   | $1.41450732 \times 10^{-03}$                   | $1.39536268 \times 10^{-03}$                   | $1.83123302 \times 10^{-03}$                   | $2.24 \times 10^{-04}$                   |
|      | JADE    | $9.86589096 \times 10^{-04}$                   | $1.12071403 \times 10^{-03}$                   | $1.29297150 \times 10^{-03}$                   | $2.61600118 \times 10^{-03}$                   | $4.09 \times 10^{-04}$                   |
|      | MPA     | $1.02482502 \times 10^{-03}$                   | $2.31374616 \times 10^{-03}$                   | $2.27477443 \times 10^{-03}$                   | $3.92610633 \times 10^{-03}$                   | $7.11 \times 10^{-04}$                   |
|      | PGJAYA  | $9.83240599 \times 10^{-04}$                   | $9.90552971 \times 10^{-04}$                   | $1.03246179 \times 10^{-03}$                   | $1.33239742 \times 10^{-03}$                   | $8.96 \times 10^{-05}$                   |
|      | RIME    | $1.00163554 \times 10^{-03}$                   | $2.27989212 \times 10^{-03}$                   | $2.42612792 \times 10^{-03}$                   | $4.40977217 \times 10^{-03}$                   | $1.00 \times 10^{-03}$                   |
|      | FPA     | $1.33759239 \times 10^{-03}$                   | $2.23654730 \times 10^{-03}$                   | $2.22696702 \times 10^{-03}$                   | $3.36136908 \times 10^{-03}$                   | $4.88 \times 10^{-04}$                   |
|      | BFPA    | <b><math>9.82484852 \times 10^{-04}</math></b> | <b><math>9.82923813 \times 10^{-04}</math></b> | <b><math>9.83788628 \times 10^{-04}</math></b> | <b><math>9.86022680 \times 10^{-04}</math></b> | <b><math>1.49 \times 10^{-06}</math></b> |
| PMM  | BSA     | $2.43257889 \times 10^{-03}$                   | $2.45897719 \times 10^{-03}$                   | $2.47347882 \times 10^{-03}$                   | $2.66095159 \times 10^{-03}$                   | $4.67 \times 10^{-05}$                   |
|      | CSA     | $4.88686473 \times 10^{-03}$                   | $6.21996473 \times 10^{-03}$                   | $6.36729830 \times 10^{-03}$                   | $8.39056856 \times 10^{-03}$                   | $1.08 \times 10^{-03}$                   |
|      | GOTLBO  | $2.43128427 \times 10^{-03}$                   | $2.52563980 \times 10^{-03}$                   | $2.53645391 \times 10^{-03}$                   | $3.12057445 \times 10^{-03}$                   | $1.19 \times 10^{-04}$                   |

|        |                              |                              |                              |                              |                        |
|--------|------------------------------|------------------------------|------------------------------|------------------------------|------------------------|
| JADE   | $2.42511242 \times 10^{-03}$ | $2.43177711 \times 10^{-03}$ | $2.44085742 \times 10^{-03}$ | $2.48592049 \times 10^{-03}$ | $1.81 \times 10^{-05}$ |
| MPA    | $2.43367927 \times 10^{-03}$ | $2.62402871 \times 10^{-03}$ | $3.18292893 \times 10^{-03}$ | $1.92703054 \times 10^{-02}$ | $3.04 \times 10^{-03}$ |
| PGJAYA | $2.42507608 \times 10^{-03}$ | $2.42874533 \times 10^{-03}$ | $2.45231199 \times 10^{-03}$ | $2.64324423 \times 10^{-03}$ | $5.76 \times 10^{-05}$ |
| RIME   | $2.47598667 \times 10^{-03}$ | $2.73825329 \times 10^{-03}$ | $3.67252826 \times 10^{-03}$ | $1.11934369 \times 10^{-02}$ | $1.92 \times 10^{-03}$ |
| FPA    | $2.43404729 \times 10^{-03}$ | $2.56941663 \times 10^{-03}$ | $2.56811529 \times 10^{-03}$ | $2.62343284 \times 10^{-03}$ | $3.93 \times 10^{-05}$ |
| BFPA   | $2.42507487 \times 10^{-03}$ | $2.42507487 \times 10^{-03}$ | $2.42507487 \times 10^{-03}$ | $2.42507487 \times 10^{-03}$ | $1.99 \times 10^{-17}$ |

**Table S4.** The Wilcoxon signed rank test with  $\alpha=5\%$ .

| Model | Item           | Win | Tie | Lose | R <sup>+</sup> | R <sup>-</sup> | P Value                | Hypothesis |
|-------|----------------|-----|-----|------|----------------|----------------|------------------------|------------|
| SDM   | BFPA vs BSA    | 30  | 0   | 0    | 465            | 0              | $1.73 \times 10^{-06}$ | 1          |
|       | BFPA vs CSA    | 30  | 0   | 0    | 465            | 0              | $1.73 \times 10^{-06}$ | 1          |
|       | BFPA vs GOTLBO | 30  | 0   | 0    | 465            | 0              | $1.73 \times 10^{-06}$ | 1          |
|       | BFPA vs JADE   | 30  | 0   | 0    | 465            | 0              | $1.73 \times 10^{-06}$ | 1          |
|       | BFPA vs MPA    | 30  | 0   | 0    | 465            | 0              | $1.73 \times 10^{-06}$ | 1          |
|       | BFPA vs PGJAYA | 30  | 0   | 0    | 465            | 0              | $1.73 \times 10^{-06}$ | 1          |
|       | BFPA vs RIME   | 30  | 0   | 0    | 465            | 0              | $1.73 \times 10^{-06}$ | 1          |
|       | BFPA vs FPA    | 30  | 0   | 0    | 465            | 0              | $1.73 \times 10^{-06}$ | 1          |
| DDM   | BFPA vs BSA    | 30  | 0   | 0    | 465            | 0              | $1.73 \times 10^{-06}$ | 1          |
|       | BFPA vs CSA    | 30  | 0   | 0    | 465            | 0              | $1.73 \times 10^{-06}$ | 1          |
|       | BFPA vs GOTLBO | 30  | 0   | 0    | 465            | 0              | $1.73 \times 10^{-06}$ | 1          |
|       | BFPA vs JADE   | 30  | 0   | 0    | 465            | 0              | $1.73 \times 10^{-06}$ | 1          |
|       | BFPA vs MPA    | 30  | 0   | 0    | 465            | 0              | $1.73 \times 10^{-06}$ | 1          |
|       | BFPA vs PGJAYA | 27  | 0   | 3    | 457            | 8              | $3.88 \times 10^{-06}$ | 1          |
|       | BFPA vs RIME   | 30  | 0   | 0    | 465            | 0              | $1.73 \times 10^{-06}$ | 1          |
|       | BFPA vs FPA    | 30  | 0   | 0    | 465            | 0              | $1.73 \times 10^{-06}$ | 1          |
| PVM   | BFPA vs BSA    | 30  | 0   | 0    | 465            | 0              | $1.73 \times 10^{-06}$ | 1          |
|       | BFPA vs CSA    | 30  | 0   | 0    | 465            | 0              | $1.73 \times 10^{-06}$ | 1          |
|       | BFPA vs GOTLBO | 30  | 0   | 0    | 465            | 0              | $1.73 \times 10^{-06}$ | 1          |
|       | BFPA vs JADE   | 30  | 0   | 0    | 465            | 0              | $1.73 \times 10^{-06}$ | 1          |
|       | BFPA vs MPA    | 30  | 0   | 0    | 465            | 0              | $1.73 \times 10^{-06}$ | 1          |
|       | BFPA vs PGJAYA | 30  | 0   | 0    | 465            | 0              | $1.73 \times 10^{-06}$ | 1          |
|       | BFPA vs RIME   | 30  | 0   | 0    | 465            | 0              | $1.73 \times 10^{-06}$ | 1          |
|       | BFPA vs FPA    | 30  | 0   | 0    | 465            | 0              | $1.73 \times 10^{-06}$ | 1          |

**Table S5.** The optimal parameter results for SDM.

| Methods | $I_{ph}$ (A) | $I_{sd}$ ( $\mu$ A) | $R_s$ ( $\Omega$ ) | $R_{sh}$ ( $\Omega$ ) | $n$        | RSME                         |
|---------|--------------|---------------------|--------------------|-----------------------|------------|------------------------------|
| BSA     | 0.76101083   | 0.33272080          | 0.03623004         | 51.99260501           | 1.48421452 | $9.98587889 \times 10^{-04}$ |
| CSA     | 0.76049982   | 0.60990297          | 0.03374108         | 80.41166897           | 1.54804154 | $1.57400251 \times 10^{-03}$ |
| GOTLBO  | 0.76079618   | 0.32629434          | 0.03632583         | 53.62615956           | 1.48220425 | $9.86489640 \times 10^{-04}$ |
| JADE    | 0.76077429   | 0.32298973          | 0.03637701         | 53.71435829           | 1.48117442 | $9.86022997 \times 10^{-04}$ |
| MPA     | 0.76074259   | 0.38846536          | 0.03562233         | 58.47357679           | 1.50000478 | $1.04794349 \times 10^{-03}$ |
| PGJAYA  | 0.76077527   | 0.32291721          | 0.03637856         | 53.71586523           | 1.48115115 | $9.86022139 \times 10^{-04}$ |
| RIME    | 0.76082520   | 0.34959810          | 0.03602140         | 54.55788384           | 1.48921854 | $1.00066761 \times 10^{-03}$ |
| FPA     | 0.76041659   | 0.43246234          | 0.03519397         | 63.68218988           | 1.51117040 | $1.14571574 \times 10^{-03}$ |
| BFPA    | 0.76077553   | 0.32302082          | 0.03637709         | 53.71852531           | 1.48118359 | $9.86021878 \times 10^{-04}$ |

**Table S6.** The error value of current and power on SDM.

| Index | Observed data |              | Simulated current data        |                               |                               | Simulated power data          |                               |
|-------|---------------|--------------|-------------------------------|-------------------------------|-------------------------------|-------------------------------|-------------------------------|
|       | $V_{obs}(V)$  | $I_{obs}(A)$ | $I_{sim}(A)$                  | $IA_e(A)$                     | $IR_e(A)$                     | $W_{sim}(W)$                  | $WA_e(W)$                     |
| 1     | -0.2057       | 0.7640       | $7.64087704 \times 10^{-01}$  | $8.77035433 \times 10^{-05}$  | $1.14795214 \times 10^{-02}$  | $-1.57172841 \times 10^{-01}$ | $-1.80406189 \times 10^{-05}$ |
| 2     | -0.1291       | 0.7620       | $7.62663086 \times 10^{-01}$  | $6.63085899 \times 10^{-04}$  | $8.70191468 \times 10^{-02}$  | $-9.84598044 \times 10^{-02}$ | $-8.56043895 \times 10^{-05}$ |
| 3     | -0.0588       | 0.7605       | $7.61355307 \times 10^{-01}$  | $8.55306879 \times 10^{-04}$  | $1.12466388 \times 10^{-01}$  | $-4.47676920 \times 10^{-02}$ | $-5.02920445 \times 10^{-05}$ |
| 4     | 0.0057        | 0.7605       | $7.60153991 \times 10^{-01}$  | $-3.46009267 \times 10^{-04}$ | $-4.54976025 \times 10^{-02}$ | $4.33287775 \times 10^{-03}$  | $-1.97225282 \times 10^{-06}$ |
| 5     | 0.0646        | 0.7600       | $7.59055209 \times 10^{-01}$  | $-9.44791397 \times 10^{-04}$ | $-1.24314658 \times 10^{-01}$ | $4.90349665 \times 10^{-02}$  | $-6.10335243 \times 10^{-05}$ |
| 6     | 0.1185        | 0.7590       | $7.58042345 \times 10^{-01}$  | $-9.57655048 \times 10^{-04}$ | $-1.26173261 \times 10^{-01}$ | $8.98280179 \times 10^{-02}$  | $-1.13482123 \times 10^{-04}$ |
| 7     | 0.1678        | 0.7570       | $7.57091654 \times 10^{-01}$  | $9.16536918 \times 10^{-05}$  | $1.21074890 \times 10^{-02}$  | $1.27039979 \times 10^{-01}$  | $1.53794895 \times 10^{-05}$  |
| 8     | 0.2132        | 0.7570       | $7.56141365 \times 10^{-01}$  | $-8.58635457 \times 10^{-04}$ | $-1.13426084 \times 10^{-01}$ | $1.61209339 \times 10^{-01}$  | $-1.83061079 \times 10^{-04}$ |
| 9     | 0.2545        | 0.7555       | $7.55086872 \times 10^{-01}$  | $-4.13127503 \times 10^{-04}$ | $-5.46826609 \times 10^{-02}$ | $1.92169609 \times 10^{-01}$  | $-1.05140950 \times 10^{-04}$ |
| 10    | 0.2924        | 0.7540       | $7.53663878 \times 10^{-01}$  | $-3.36121970 \times 10^{-04}$ | $-4.45785106 \times 10^{-02}$ | $2.20371318 \times 10^{-01}$  | $-9.82820641 \times 10^{-05}$ |
| 11    | 0.3269        | 0.7505       | $7.51390966 \times 10^{-01}$  | $8.90966348 \times 10^{-04}$  | $1.18716369 \times 10^{-01}$  | $2.45629707 \times 10^{-01}$  | $2.91256899 \times 10^{-04}$  |
| 12    | 0.3585        | 0.7465       | $7.47353851 \times 10^{-01}$  | $8.53851267 \times 10^{-04}$  | $1.14380612 \times 10^{-01}$  | $2.67926356 \times 10^{-01}$  | $3.06105679 \times 10^{-04}$  |
| 13    | 0.3873        | 0.7385       | $7.40117222 \times 10^{-01}$  | $1.61722183 \times 10^{-03}$  | $2.18987383 \times 10^{-01}$  | $2.86647400 \times 10^{-01}$  | $6.26350013 \times 10^{-04}$  |
| 14    | 0.4137        | 0.7280       | $7.27382225 \times 10^{-01}$  | $-6.17775119 \times 10^{-04}$ | $-8.48592197 \times 10^{-02}$ | $3.00918026 \times 10^{-01}$  | $-2.55573567 \times 10^{-04}$ |
| 15    | 0.4373        | 0.7065       | $7.06972651 \times 10^{-01}$  | $4.72651213 \times 10^{-04}$  | $6.69003840 \times 10^{-02}$  | $3.09159140 \times 10^{-01}$  | $2.06690375 \times 10^{-04}$  |
| 16    | 0.4590        | 0.6755       | $6.75280151 \times 10^{-01}$  | $-2.19848741 \times 10^{-04}$ | $-3.25460757 \times 10^{-02}$ | $3.09953589 \times 10^{-01}$  | $-1.00910572 \times 10^{-04}$ |
| 17    | 0.4784        | 0.6320       | $6.30758272 \times 10^{-01}$  | $-1.24172785 \times 10^{-03}$ | $-1.96475925 \times 10^{-01}$ | $3.01754757 \times 10^{-01}$  | $-5.94042603 \times 10^{-04}$ |
| 18    | 0.4960        | 0.5730       | $5.71928358 \times 10^{-01}$  | $-1.07164194 \times 10^{-03}$ | $-1.87023027 \times 10^{-01}$ | $2.83676466 \times 10^{-01}$  | $-5.31534405 \times 10^{-04}$ |
| 19    | 0.5119        | 0.4990       | $4.99607018 \times 10^{-01}$  | $6.07018429 \times 10^{-04}$  | $1.21646980 \times 10^{-01}$  | $2.55748833 \times 10^{-01}$  | $3.10732734 \times 10^{-04}$  |
| 20    | 0.5265        | 0.4130       | $4.13648792 \times 10^{-01}$  | $6.48791986 \times 10^{-04}$  | $1.57092490 \times 10^{-01}$  | $2.17786089 \times 10^{-01}$  | $3.41588980 \times 10^{-04}$  |
| 21    | 0.5398        | 0.3165       | $3.17510109 \times 10^{-01}$  | $1.01010942 \times 10^{-03}$  | $3.19149896 \times 10^{-01}$  | $1.71391957 \times 10^{-01}$  | $5.45257065 \times 10^{-04}$  |
| 22    | 0.5521        | 0.2120       | $2.12154939 \times 10^{-01}$  | $1.54939012 \times 10^{-04}$  | $7.30844395 \times 10^{-02}$  | $1.17130742 \times 10^{-01}$  | $8.55418283 \times 10^{-05}$  |
| 23    | 0.5633        | 0.1035       | $1.02251312 \times 10^{-01}$  | $-1.24868828 \times 10^{-03}$ | $-1.20646210 \times 10^{+00}$ | $5.75981639 \times 10^{-02}$  | $-7.03386106 \times 10^{-04}$ |
| 24    | 0.5736        | -0.0100      | $-8.71754169 \times 10^{-03}$ | $1.28245831 \times 10^{-03}$  | $-1.28245831 \times 10^{+01}$ | $-5.00038192 \times 10^{-03}$ | $7.35618084 \times 10^{-04}$  |
| 25    | 0.5833        | -0.1230      | $-1.25507413 \times 10^{-01}$ | $-2.50741270 \times 10^{-03}$ | $2.03854691 \times 10^{+00}$  | $-7.32084738 \times 10^{-02}$ | $-1.46257383 \times 10^{-03}$ |
| 26    | 0.5900        | -0.2100      | $-2.08472326 \times 10^{-01}$ | $1.52767362 \times 10^{-03}$  | $-7.27463629 \times 10^{-01}$ | $-1.22998673 \times 10^{-01}$ | $9.01327437 \times 10^{-04}$  |

**Table S7.** The optimal parameter results for DDM.

| Methods | $I_{ph}(A)$ | $I_{sd1}(\mu A)$ | $R_s(\Omega)$ | $R_{sh}(\Omega)$ | $n1$       | $I_{sd2}(\mu A)$ | $n2$       | RSME                         |
|---------|-------------|------------------|---------------|------------------|------------|------------------|------------|------------------------------|
| BSA     | 0.76054838  | 0.15245541       | 0.03694720    | 53.30633319      | 1.47197339 | 0.12773690       | 1.46127400 | $1.04455879 \times 10^{-03}$ |
| CSA     | 0.76077567  | 0.63762271       | 0.03955983    | 61.25354547      | 1.58308689 | 0.00006588       | 1.00038212 | $1.10028472 \times 10^{-03}$ |
| GOTLBO  | 0.76059680  | 0.00000000       | 0.03557214    | 59.43401052      | 2.00000000 | 0.39415479       | 1.50148704 | $1.06633593 \times 10^{-03}$ |
| JADE    | 0.76072855  | 0.23160900       | 0.03652162    | 55.28826323      | 1.69272148 | 0.21739903       | 1.45396147 | $9.86589096 \times 10^{-04}$ |
| MPA     | 0.76115553  | 0.14441144       | 0.03718630    | 50.15952720      | 1.41564064 | 0.86648538       | 1.88163953 | $1.02482502 \times 10^{-03}$ |
| PGJAYA  | 0.76079497  | 0.56455684       | 0.03659603    | 55.42408081      | 2.00000000 | 0.25158810       | 1.46019804 | $9.83240599 \times 10^{-04}$ |
| RIME    | 0.76112047  | 0.21075338       | 0.03682173    | 52.15014571      | 1.44510737 | 0.85934395       | 2.00000000 | $1.00163554 \times 10^{-03}$ |
| FPA     | 0.76114221  | 0.41272022       | 0.03543291    | 61.48216377      | 1.50599519 | 0.00000000       | 1.99880982 | $1.33759239 \times 10^{-03}$ |
| BFPA    | 0.76078108  | 0.22597420       | 0.03674043    | 55.48544399      | 1.45101674 | 0.74934838       | 2.00000000 | $9.82484852 \times 10^{-04}$ |

**Table S8.** The error value of current and power on DDM.

| Index | Observed data |              | Simulated current data        |                               |                               | Simulated power data          |                               |
|-------|---------------|--------------|-------------------------------|-------------------------------|-------------------------------|-------------------------------|-------------------------------|
|       | $V_{obs}(V)$  | $I_{obs}(A)$ | $I_{sim}(A)$                  | $IA_e(A)$                     | $IR_e(A)$                     | $W_{sim}(W)$                  | $WA_e(W)$                     |
| 1     | -0.2057       | 0.7640       | $7.63983412 \times 10^{-01}$  | $-1.65876719 \times 10^{-05}$ | $-2.17116125 \times 10^{-03}$ | $-1.57151388 \times 10^{-01}$ | $3.41208412 \times 10^{-06}$  |
| 2     | -0.1291       | 0.7620       | $7.62604096 \times 10^{-01}$  | $6.04096031 \times 10^{-04}$  | $7.92776944 \times 10^{-02}$  | $-9.84521888 \times 10^{-02}$ | $-7.79887976 \times 10^{-05}$ |
| 3     | -0.0588       | 0.7605       | $7.61337698 \times 10^{-01}$  | $8.37698239 \times 10^{-04}$  | $1.10150985 \times 10^{-01}$  | $-4.47666567 \times 10^{-02}$ | $-4.92566565 \times 10^{-05}$ |
| 4     | 0.0057        | 0.7605       | $7.60173788 \times 10^{-01}$  | $-3.26212207 \times 10^{-04}$ | $-4.28944388 \times 10^{-02}$ | $4.33299059 \times 10^{-03}$  | $-1.85940958 \times 10^{-06}$ |
| 5     | 0.0646        | 0.7600       | $7.59107680 \times 10^{-01}$  | $-8.92319936 \times 10^{-04}$ | $-1.17410518 \times 10^{-01}$ | $4.90383561 \times 10^{-02}$  | $-5.76438678 \times 10^{-05}$ |
| 6     | 0.1185        | 0.7590       | $7.58121420 \times 10^{-01}$  | $-8.78580368 \times 10^{-04}$ | $-1.15754989 \times 10^{-01}$ | $8.98373882 \times 10^{-02}$  | $-1.04111774 \times 10^{-04}$ |
| 7     | 0.1678        | 0.7570       | $7.57188613 \times 10^{-01}$  | $1.88613349 \times 10^{-04}$  | $2.49158981 \times 10^{-02}$  | $1.27056249 \times 10^{-01}$  | $3.16493199 \times 10^{-05}$  |
| 8     | 0.2132        | 0.7570       | $7.56243606 \times 10^{-01}$  | $-7.56393522 \times 10^{-04}$ | $-9.99198840 \times 10^{-02}$ | $1.61231137 \times 10^{-01}$  | $-1.61263099 \times 10^{-04}$ |
| 9     | 0.2545        | 0.7555       | $7.55177301 \times 10^{-01}$  | $-3.22698976 \times 10^{-04}$ | $-4.27132992 \times 10^{-02}$ | $1.92192623 \times 10^{-01}$  | $-8.21268893 \times 10^{-05}$ |
| 10    | 0.2924        | 0.7540       | $7.53722353 \times 10^{-01}$  | $-2.77646998 \times 10^{-04}$ | $-3.68232093 \times 10^{-02}$ | $2.20388416 \times 10^{-01}$  | $-8.11839823 \times 10^{-05}$ |
| 11    | 0.3269        | 0.7505       | $7.51399134 \times 10^{-01}$  | $8.99133688 \times 10^{-04}$  | $1.19804622 \times 10^{-01}$  | $2.45632377 \times 10^{-01}$  | $2.93926803 \times 10^{-04}$  |
| 12    | 0.3585        | 0.7465       | $7.47301443 \times 10^{-01}$  | $8.01442730 \times 10^{-04}$  | $1.07360044 \times 10^{-01}$  | $2.67907567 \times 10^{-01}$  | $2.87317219 \times 10^{-04}$  |
| 13    | 0.3873        | 0.7385       | $7.40010660 \times 10^{-01}$  | $1.51066023 \times 10^{-03}$  | $2.04557919 \times 10^{-01}$  | $2.86606129 \times 10^{-01}$  | $5.85078707 \times 10^{-04}$  |
| 14    | 0.4137        | 0.7280       | $7.27246952 \times 10^{-01}$  | $-7.53047816 \times 10^{-04}$ | $-1.03440634 \times 10^{-01}$ | $3.00862064 \times 10^{-01}$  | $-3.11535881 \times 10^{-04}$ |
| 15    | 0.4373        | 0.7065       | $7.06850298 \times 10^{-01}$  | $3.50297618 \times 10^{-04}$  | $4.95821116 \times 10^{-02}$  | $3.09105635 \times 10^{-01}$  | $1.53185148 \times 10^{-04}$  |
| 16    | 0.4590        | 0.6755       | $6.75210543 \times 10^{-01}$  | $-2.89457434 \times 10^{-04}$ | $-4.28508415 \times 10^{-02}$ | $3.09921639 \times 10^{-01}$  | $-1.32860962 \times 10^{-04}$ |
| 17    | 0.4784        | 0.6320       | $6.30760758 \times 10^{-01}$  | $-1.23924224 \times 10^{-03}$ | $-1.96082633 \times 10^{-01}$ | $3.01755947 \times 10^{-01}$  | $-5.92853488 \times 10^{-04}$ |
| 18    | 0.4960        | 0.5730       | $5.71994733 \times 10^{-01}$  | $-1.00526702 \times 10^{-03}$ | $-1.75439271 \times 10^{-01}$ | $2.83709388 \times 10^{-01}$  | $-4.98612443 \times 10^{-04}$ |
| 19    | 0.5119        | 0.4990       | $4.99706135 \times 10^{-01}$  | $7.06135253 \times 10^{-04}$  | $1.41510071 \times 10^{-01}$  | $2.55799571 \times 10^{-01}$  | $3.61470636 \times 10^{-04}$  |
| 20    | 0.5265        | 0.4130       | $4.13733673 \times 10^{-01}$  | $7.33672552 \times 10^{-04}$  | $1.77644686 \times 10^{-01}$  | $2.17830779 \times 10^{-01}$  | $3.86278599 \times 10^{-04}$  |
| 21    | 0.5398        | 0.3165       | $3.17546205 \times 10^{-01}$  | $1.04620531 \times 10^{-03}$  | $3.30554599 \times 10^{-01}$  | $1.71411442 \times 10^{-01}$  | $5.64741624 \times 10^{-04}$  |
| 22    | 0.5521        | 0.2120       | $2.12122995 \times 10^{-01}$  | $1.22995453 \times 10^{-04}$  | $5.80167231 \times 10^{-02}$  | $1.17113106 \times 10^{-01}$  | $6.79057896 \times 10^{-05}$  |
| 23    | 0.5633        | 0.1035       | $1.02163276 \times 10^{-01}$  | $-1.33672396 \times 10^{-03}$ | $-1.29152073 \times 10^{+00}$ | $5.75485734 \times 10^{-02}$  | $-7.52976604 \times 10^{-04}$ |
| 24    | 0.5736        | -0.0100      | $-8.79175112 \times 10^{-03}$ | $1.20824888 \times 10^{-03}$  | $-1.20824888 \times 10^{+01}$ | $-5.04294844 \times 10^{-03}$ | $6.93051559 \times 10^{-04}$  |
| 25    | 0.5833        | -0.1230      | $-1.25543435 \times 10^{-01}$ | $-2.54343465 \times 10^{-03}$ | $2.06783305 \times 10^{+00}$  | $-7.32294854 \times 10^{-02}$ | $-1.48358543 \times 10^{-03}$ |
| 26    | 0.5900        | -0.2100      | $-2.08371588 \times 10^{-01}$ | $1.62841193 \times 10^{-03}$  | $-7.75434254 \times 10^{-01}$ | $-1.22939237 \times 10^{-01}$ | $9.60763041 \times 10^{-04}$  |

**Table S9.** The optimal parameter results for PMM.

| Methods | $I_{ph}(A)$ | $I_{sd}(\mu A)$ | $R_s(\Omega)$ | $R_{sh}(\Omega)$ | $n$         | RSME                        |
|---------|-------------|-----------------|---------------|------------------|-------------|-----------------------------|
| BSA     | 1.03022364  | 3.67004181      | 1.19657495    | 1061.89575872    | 48.84363047 | $2.4325789 \times 10^{-03}$ |
| CSA     | 1.03909735  | 0.71851380      | 1.34729333    | 377.38332989     | 43.26578397 | $4.8868647 \times 10^{-03}$ |
| GOTLBO  | 1.03054734  | 3.60569306      | 1.19762664    | 985.64658115     | 48.77823538 | $2.4312843 \times 10^{-03}$ |
| JADE    | 1.03049288  | 3.49859381      | 1.20081875    | 986.94251174     | 48.66071913 | $2.4251124 \times 10^{-03}$ |
| MPA     | 1.03057320  | 3.69411165      | 1.19427168    | 1000.96281408    | 48.87153638 | $2.4336793 \times 10^{-03}$ |
| PGJAYA  | 1.03050672  | 3.48490320      | 1.20119536    | 983.18987863     | 48.64571923 | $2.4250761 \times 10^{-03}$ |
| RIME    | 1.02919421  | 4.15349707      | 1.18290035    | 1263.76810861    | 49.32607751 | $2.4759867 \times 10^{-03}$ |
| FPA     | 1.02977599  | 3.64086833      | 1.19676648    | 1072.91382269    | 48.81370866 | $2.4340473 \times 10^{-03}$ |
| BFPA    | 1.03051430  | 3.48226280      | 1.20127101    | 981.98222691     | 48.64283473 | $2.4250749 \times 10^{-03}$ |

**Table S10.** The error value of current and power on PMM.

| Index | Observed data |              | Simulated current data        |                               |                               | Simulated power data          |                               |
|-------|---------------|--------------|-------------------------------|-------------------------------|-------------------------------|-------------------------------|-------------------------------|
|       | $V_{obs}(V)$  | $I_{obs}(A)$ | $I_{sim}(A)$                  | $IA_e(A)$                     | $IR_e(A)$                     | $W_{sim}(W)$                  | $WA_e(W)$                     |
| 1     | 0.1248        | 1.0315       | $1.02911916 \times 10^{+00}$  | $-2.38083837 \times 10^{-03}$ | $-2.30813220 \times 10^{-01}$ | $1.28434071 \times 10^{-01}$  | $-2.97128628 \times 10^{-04}$ |
| 2     | 1.8093        | 1.03         | $1.02738107 \times 10^{+00}$  | $-2.61892659 \times 10^{-03}$ | $-2.54264718 \times 10^{-01}$ | $1.85884058 \times 10^{+00}$  | $-4.73842388 \times 10^{-03}$ |
| 3     | 3.3511        | 1.026        | $1.02574180 \times 10^{+00}$  | $-2.58202877 \times 10^{-04}$ | $-2.51659724 \times 10^{-02}$ | $3.43736334 \times 10^{+00}$  | $-8.65263661 \times 10^{-04}$ |
| 4     | 4.7622        | 1.022        | $1.02410715 \times 10^{+00}$  | $2.10715494 \times 10^{-03}$  | $2.06179544 \times 10^{-01}$  | $4.87700309 \times 10^{+00}$  | $1.00346933 \times 10^{-02}$  |
| 5     | 6.0538        | 1.018        | $1.02229180 \times 10^{+00}$  | $4.29180468 \times 10^{-03}$  | $4.21591815 \times 10^{-01}$  | $6.18875013 \times 10^{+00}$  | $2.59817272 \times 10^{-02}$  |
| 6     | 7.2364        | 1.0155       | $1.01993068 \times 10^{+00}$  | $4.43068095 \times 10^{-03}$  | $4.36305362 \times 10^{-01}$  | $7.38062638 \times 10^{+00}$  | $3.20621797 \times 10^{-02}$  |
| 7     | 8.3189        | 1.014        | $1.01636311 \times 10^{+00}$  | $2.36310572 \times 10^{-03}$  | $2.33047901 \times 10^{-01}$  | $8.45502304 \times 10^{+00}$  | $1.96584402 \times 10^{-02}$  |
| 8     | 9.3097        | 1.01         | $1.01049615 \times 10^{+00}$  | $4.96151344 \times 10^{-04}$  | $4.91238954 \times 10^{-02}$  | $9.40741602 \times 10^{+00}$  | $4.61902016 \times 10^{-03}$  |
| 9     | 10.2163       | 1.0035       | $1.00062897 \times 10^{+00}$  | $-2.87103027 \times 10^{-03}$ | $-2.86101671 \times 10^{-01}$ | $1.02227257 \times 10^{+01}$  | $-2.93313066 \times 10^{-02}$ |
| 10    | 11.0449       | 0.988        | $9.84548378 \times 10^{-01}$  | $-3.45162151 \times 10^{-03}$ | $-3.49354404 \times 10^{-01}$ | $1.08742384 \times 10^{+01}$  | $-3.81228144 \times 10^{-02}$ |
| 11    | 11.8018       | 0.963        | $9.59521676 \times 10^{-01}$  | $-3.47832391 \times 10^{-03}$ | $-3.61196668 \times 10^{-01}$ | $1.13240829 \times 10^{+01}$  | $-4.10504831 \times 10^{-02}$ |
| 12    | 12.4929       | 0.9255       | $9.22838818 \times 10^{-01}$  | $-2.66118198 \times 10^{-03}$ | $-2.87539922 \times 10^{-01}$ | $1.15289331 \times 10^{+01}$  | $-3.32458804 \times 10^{-02}$ |
| 13    | 13.1231       | 0.8725       | $8.72599663 \times 10^{-01}$  | $9.96627823 \times 10^{-05}$  | $1.14226685 \times 10^{-02}$  | $1.14512126 \times 10^{+01}$  | $1.30788466 \times 10^{-03}$  |
| 14    | 13.6983       | 0.8075       | $8.07274264 \times 10^{-01}$  | $-2.25736362 \times 10^{-04}$ | $-2.79549674 \times 10^{-02}$ | $1.10582850 \times 10^{+01}$  | $-3.09220441 \times 10^{-03}$ |
| 15    | 14.2221       | 0.7265       | $7.28336478 \times 10^{-01}$  | $1.83647796 \times 10^{-03}$  | $2.52784302 \times 10^{-01}$  | $1.03584742 \times 10^{+01}$  | $2.61185732 \times 10^{-02}$  |
| 16    | 14.6995       | 0.6345       | $6.37138000 \times 10^{-01}$  | $2.63799997 \times 10^{-03}$  | $4.15760437 \times 10^{-01}$  | $9.36561003 \times 10^{+00}$  | $3.87772806 \times 10^{-02}$  |
| 17    | 15.1346       | 0.5345       | $5.36213063 \times 10^{-01}$  | $1.71306309 \times 10^{-03}$  | $3.20498239 \times 10^{-01}$  | $8.11537022 \times 10^{+00}$  | $2.59265246 \times 10^{-02}$  |
| 18    | 15.5311       | 0.4275       | $4.29511325 \times 10^{-01}$  | $2.01132483 \times 10^{-03}$  | $4.70485339 \times 10^{-01}$  | $6.67078334 \times 10^{+00}$  | $3.12380870 \times 10^{-02}$  |
| 19    | 15.8929       | 0.3185       | $3.18774483 \times 10^{-01}$  | $2.74482673 \times 10^{-04}$  | $8.61798030 \times 10^{-02}$  | $5.06625098 \times 10^{+00}$  | $4.36232567 \times 10^{-03}$  |
| 20    | 16.2229       | 0.2085       | $2.07389507 \times 10^{-01}$  | $-1.11049345 \times 10^{-03}$ | $-5.32610768 \times 10^{-01}$ | $3.36445923 \times 10^{+00}$  | $-1.80154242 \times 10^{-02}$ |
| 21    | 16.5241       | 0.101        | $9.61671716 \times 10^{-02}$  | $-4.83282836 \times 10^{-03}$ | $-4.78497857 \times 10^{+00}$ | $1.58907596 \times 10^{+00}$  | $-7.98581391 \times 10^{-02}$ |
| 22    | 16.7987       | -0.008       | $-8.32538625 \times 10^{-03}$ | $-3.25386249 \times 10^{-04}$ | $4.06732812 \times 10^{+00}$  | $-1.39855666 \times 10^{-01}$ | $-5.46606599 \times 10^{-03}$ |
| 23    | 17.0499       | -0.111       | $-1.10936483 \times 10^{-01}$ | $6.35171862 \times 10^{-05}$  | $-5.72226902 \times 10^{-02}$ | $-1.89145594 \times 10^{+00}$ | $1.08296167 \times 10^{-03}$  |
| 24    | 17.2793       | -0.209       | $-2.09247266 \times 10^{-01}$ | $-2.47265950 \times 10^{-04}$ | $1.18309067 \times 10^{-01}$  | $-3.61564628 \times 10^{+00}$ | $-4.27258253 \times 10^{-03}$ |
| 25    | 17.4885       | -0.303       | $-3.00863587 \times 10^{-01}$ | $2.13641311 \times 10^{-03}$  | $-7.05086834 \times 10^{-01}$ | $-5.26165284 \times 10^{+00}$ | $3.73626606 \times 10^{-02}$  |

**Table S11.** The optimal parameter optimized by BFPA at diverse irradiance under 25°C.

| PV modules                   | Irradiance            | $I_{ph}(A)$ | $I_{sd}(\mu A)$ | $R_s(\Omega)$ | $R_{sh}(\Omega)$ | $n$        | RMSE                         |
|------------------------------|-----------------------|-------------|-----------------|---------------|------------------|------------|------------------------------|
| Multi-crystalline<br>KC200GT | 200 W/m <sup>2</sup>  | 1.64609182  | 0.00054482      | 0.37731977    | 693.13340621     | 1.00526877 | $1.41940597 \times 10^{-03}$ |
|                              | 400 W/m <sup>2</sup>  | 3.28764910  | 0.00164152      | 0.34879442    | 760.20808231     | 1.05974716 | $1.46759303 \times 10^{-03}$ |
|                              | 600 W/m <sup>2</sup>  | 4.93425104  | 0.00428176      | 0.33468345    | 757.59233988     | 1.10946146 | $1.42605190 \times 10^{-03}$ |
|                              | 800 W/m <sup>2</sup>  | 6.56829338  | 0.00171108      | 0.34725645    | 971.98166206     | 1.06257598 | $3.88076100 \times 10^{-03}$ |
|                              | 1000 W/m <sup>2</sup> | 8.21502928  | 0.00289278      | 0.34006651    | 895.87425192     | 1.08890343 | $2.45314979 \times 10^{-03}$ |
| Mono-crystalline<br>SM55     | 200 W/m <sup>2</sup>  | 0.69150980  | 0.14641535      | 0.28660654    | 448.21114321     | 1.38066251 | $3.20694650 \times 10^{-04}$ |
|                              | 400 W/m <sup>2</sup>  | 1.38284436  | 0.10041531      | 0.39666425    | 427.04853066     | 1.35198509 | $7.07550905 \times 10^{-04}$ |
|                              | 600 W/m <sup>2</sup>  | 2.07089696  | 0.15548337      | 0.33051596    | 450.05498502     | 1.38751772 | $8.23694730 \times 10^{-04}$ |
|                              | 800 W/m <sup>2</sup>  | 2.76038170  | 0.14395762      | 0.33758505    | 459.88014836     | 1.38114824 | $6.68957647 \times 10^{-04}$ |
|                              | 1000 W/m <sup>2</sup> | 3.45010312  | 0.17117382      | 0.32914250    | 483.91634763     | 1.39576242 | $1.14593887 \times 10^{-03}$ |

|                |                       |            |            |            |              |            |                              |
|----------------|-----------------------|------------|------------|------------|--------------|------------|------------------------------|
| Thin-film ST40 | 200 W/m <sup>2</sup>  | 0.53313748 | 1.42961336 | 1.18575100 | 344.98274457 | 1.74710283 | 4.77207029×10 <sup>-04</sup> |
|                | 400 W/m <sup>2</sup>  | 1.06754397 | 1.84883695 | 1.08056985 | 362.51801446 | 1.77853676 | 6.30835834×10 <sup>-04</sup> |
|                | 600 W/m <sup>2</sup>  | 1.60480945 | 1.44191024 | 1.11260797 | 347.69711511 | 1.74512745 | 6.74028226×10 <sup>-04</sup> |
|                | 800 W/m <sup>2</sup>  | 2.13801481 | 1.15810495 | 1.12528628 | 332.88869608 | 1.71867399 | 7.74145986×10 <sup>-04</sup> |
|                | 1000 W/m <sup>2</sup> | 2.67579975 | 1.52880486 | 1.11322513 | 357.59787072 | 1.75032678 | 7.34207806×10 <sup>-04</sup> |

**Table S12.** The optimal parameter optimized by BFPA at different temperatures under 1000 W/m<sup>2</sup>.

| PV modules                   | Temperature | $I_{ph}$ (A) | $I_{sd}$ (μA) | $R_s$ (Ω)  | $R_{sh}$ (Ω) | $n$        | RMSE                         |
|------------------------------|-------------|--------------|---------------|------------|--------------|------------|------------------------------|
| Multi-crystalline<br>KC200GT | 25°C        | 8.21440098   | 0.00305062    | 0.33875797 | 924.92112398 | 1.09150236 | 2.75958568×10 <sup>-03</sup> |
|                              | 50°C        | 8.29530599   | 0.12593260    | 0.33565856 | 953.79513259 | 1.11728235 | 2.74632793×10 <sup>-03</sup> |
|                              | 75°C        | 8.37766334   | 1.63086359    | 0.34249674 | 790.54609087 | 1.10148163 | 4.47064521×10 <sup>-03</sup> |
| Mono-crystalline<br>SM55     | 25°C        | 4.93408935   | 0.00411685    | 0.33577319 | 756.03951527 | 1.10739010 | 1.34480754×10 <sup>-03</sup> |
|                              | 40°C        | 3.28662231   | 0.00194388    | 0.34281529 | 813.02399445 | 1.01694478 | 1.62874637×10 <sup>-03</sup> |
|                              | 60°C        | 1.64616713   | 0.00057178    | 0.37289300 | 691.38759612 | 1.35243208 | 1.42314651×10 <sup>-03</sup> |
| Thin-film ST40               | 25°C        | 2.67579975   | 1.52880479    | 1.11322513 | 357.59786915 | 1.75032677 | 7.34207806×10 <sup>-04</sup> |
|                              | 40°C        | 2.68091215   | 5.66605502    | 1.12929801 | 364.10670651 | 1.72255682 | 1.32166203×10 <sup>-03</sup> |
|                              | 55°C        | 2.69196884   | 18.67997841   | 1.14959391 | 295.01766312 | 1.71757078 | 1.82375586×10 <sup>-03</sup> |
|                              | 70°C        | 2.69232889   | 87.52623900   | 1.12588313 | 367.76428759 | 1.72732815 | 7.77862370×10 <sup>-04</sup> |
